# Supplementary material
Source: PubMed Central journal article supplement (PMC4113173)
Supplement: supp_dc13-2939v132939_DC132939SupplementaryData.pdf [file supp_dc13-2939v132939_DC132939SupplementaryData.pdf]

SUPPLEMENTARY DATA

**Supplementary Table 1.** Prevalence of Diabetes by Sex, Hispanic/Latino Background, Body Mass Index and When Diagnosed

|                               | Prevalence (95% Confidence Interval: CI) |                                                                                    |                                            |                                                         |                                                                      |
|-------------------------------|------------------------------------------|------------------------------------------------------------------------------------|--------------------------------------------|---------------------------------------------------------|----------------------------------------------------------------------|
|                               | Sample Size                              | Self-report <sup>a,b</sup> + first recognized at exam <sup>c</sup> Prevalence (CI) | Self-report <sup>a,b</sup> Prevalence (CI) | First recognized at exam <sup>a,c</sup> Prevalence (CI) | Self-report <sup>b,d</sup> + first recognized at exam <sup>c,d</sup> |
| <b>Overall</b>                | 16406                                    | 18.0 (17.17, 18.88)                                                                | 11.9 (11.19, 12.59)                        | 6.2 (5.69, 6.68)                                        | 15.9 (15.01, 16.80)                                                  |
| <b>Men</b>                    | 6577                                     | 17.7 (16.53, 19.02)                                                                | 12.0 (11.06, 12.96)                        | 5.8 (5.12, 6.56)                                        | 15.0 (13.84, 16.26)                                                  |
| <b>Women</b>                  | 9829                                     | 18.2 (17.20, 19.25)                                                                | 11.8 (10.87, 12.74)                        | 6.5 (5.82, 7.15)                                        | 16.7 (15.62, 17.82)                                                  |
| <b>Hispanic Background</b>    |                                          |                                                                                    |                                            |                                                         |                                                                      |
| <b>Dominican</b>              | 1472                                     | 19.8 (17.71, 21.98)                                                                | 14.5 (12.59, 16.54)                        | 5.3 (4.22, 6.66)                                        | 15.4 (13.22, 17.93)                                                  |
| <b>Central American</b>       | 1731                                     | 18.3 (15.91, 20.86)                                                                | 11.1 (9.09, 13.49)                         | 7.2 (5.69, 9.05)                                        | 14.2 (12.08, 16.53)                                                  |
| <b>Cuban</b>                  | 2347                                     | 14.2 (12.79, 15.80)                                                                | 8.4 (7.26, 9.76)                           | 5.8 (4.88, 6.90)                                        | 16.9 (15.03, 19.05)                                                  |
| <b>Mexican</b>                | 6468                                     | 19.5 (17.93, 21.08)                                                                | 12.8 (11.70, 13.99)                        | 6.7 (5.83, 7.60)                                        | 15.2 (13.93, 16.59)                                                  |
| <b>Puerto Rican</b>           | 2727                                     | 19.5 (17.57, 21.61)                                                                | 14.7 (13.17, 16.48)                        | 4.8 (3.95, 5.80)                                        | 19.1 (17.07, 21.30)                                                  |
| <b>South American</b>         | 1071                                     | 11.3 (9.32, 13.57)                                                                 | 6.1 (4.63, 7.89)                           | 5.2 (3.87, 6.98)                                        | 10.2 (8.07, 12.77)                                                   |
| <b>Mixed/Other</b>            | 503                                      | 21.6 (16.34, 28.06)                                                                | 15.9 (10.56, 23.32)                        | 5.7 (3.16, 10.10)                                       | 10.9 (6.95, 16.55)                                                   |
| <b>Missing</b>                | 87                                       | 57.7 (46.95, 67.84)                                                                | 35.1 (22.66, 50.00)                        | 36.7 (25.19, 49.90)                                     | 58.2 (39.97, 74.48)                                                  |
| <b>Age Group (yrs)</b>        |                                          |                                                                                    |                                            |                                                         |                                                                      |
| <b>18-29</b>                  | 2676                                     | 2.8 (2.20, 3.68)                                                                   | 1.6 (1.14, 2.30)                           | 1.2 (0.84, 1.79)                                        | 2.8 (2.20, 3.68)                                                     |
| <b>30-39</b>                  | 2391                                     | 7.2 (5.93, 8.64)                                                                   | 4.3 (3.37, 5.54)                           | 2.9 (2.15, 3.80)                                        | 7.2 (5.93, 8.64)                                                     |
| <b>40-49</b>                  | 4208                                     | 15.1 (13.56, 16.76)                                                                | 8.6 (7.53, 9.88)                           | 6.5 (5.51, 7.63)                                        | 15.1 (13.56, 16.76)                                                  |
| <b>50-59</b>                  | 4339                                     | 27.1 (24.84, 29.57)                                                                | 18.2 (16.31, 20.28)                        | 9.0 (7.92, 10.11)                                       | 27.1 (24.84, 29.57)                                                  |
| <b>60-69</b>                  | 2289                                     | 40.4 (37.33, 43.48)                                                                | 28.5 (25.84, 31.31)                        | 11.9 (10.10, 14.08)                                     | 40.4 (37.33, 43.48)                                                  |
| <b>70-74</b>                  | 503                                      | 51.5 (44.54, 58.37)                                                                | 35.9 (29.29, 43.04)                        | 15.6 (11.59, 20.74)                                     | 51.5 (44.54, 58.37)                                                  |
| <b>BMI (kg/m<sup>2</sup>)</b> |                                          |                                                                                    |                                            |                                                         |                                                                      |
| <b>&lt;25</b>                 | 3320                                     | 10.7 (9.37, 12.13)                                                                 | 7.3 (6.17, 8.65)                           | 3.4 (2.63, 4.29)                                        | 6.8 (5.89, 7.87)                                                     |
| <b>≥ 25 &lt;30</b>            | 6113                                     | 15.2 (13.96, 16.45)                                                                | 10.0 (9.04, 10.95)                         | 5.2 (4.54, 6.02)                                        | 14.2 (12.94, 15.58)                                                  |
| <b>≥ 30</b>                   | 6902                                     | 23.7 (22.40, 25.08)                                                                | 15.5 (14.30, 16.76)                        | 8.3 (7.43, 9.20)                                        | 22.6 (21.13, 24.23)                                                  |

## SUPPLEMENTARY DATA

|                |    |                     |                     |                    |                     |
|----------------|----|---------------------|---------------------|--------------------|---------------------|
| <b>Missing</b> | 71 | 33.7 (23.86, 45.19) | 22.3 (15.69, 30.70) | 13.9 (6.98, 25.94) | 33.4 (22.84, 45.91) |
|----------------|----|---------------------|---------------------|--------------------|---------------------|

<sup>a</sup> Values except sample size are weighted for study design and nonresponse and age standardized to Census 2010 US population

<sup>b</sup> Diabetes on basis of self-report of previous diagnosis and/or self-report of hypoglycemic medications.

<sup>c</sup> Diabetes first recognized during exam on basis of FPG, 2-h OGTT, A1c, or scanned medications

<sup>d</sup> Values except sample size are weighted for study design and nonresponse, but not age standardized to US population

### **Appendix I. Full list of Principal Investigators and Co-Principal Investigators that worked in the HCHS-SOL during its first contract period (October 2006 to June 2013)**

San Diego Field Center (San Diego State University and University of California at San Diego)

Gregory A. Talavera, MD, MPH, John P. Elder, PhD, Matthew Allison, MD, Michael Criqui, MD

Chicago Field Center (Northwestern University and University of Illinois at Chicago) Martha Daviglus, MD, PhD, Aida Giachello, PhD, Kiang Liu, PhD

Miami Field Center (University of Miami) Neil Schneiderman, PhD, David J. Lee, PhD, Leopoldo Raij, MD

Bronx Field Center (Albert Einstein College of Medicine of the Yeshiva University) Robert Kaplan, PhD, Sylvia Wassertheil-Smoller, PhD

Coordinating Center (University of North Carolina at Chapel Hill) Lisa LaVange, PhD, Lloyd Chambless, PhD, Jianwen Cai, PhD, Gerardo Heiss, MD, PhD, Diane Catellier, PhD, Marston Youngblood, MA, MPH

ECG Reading Center (Wake Forest University) Elsayed Soliman, PhD

Pulmonary Reading Center (Columbia University) Graham Barr, MD, Paul Enright, PhD

Cognitive Reading Center (University of Mississippi Medical Center and Wayne University) Thomas Mosley, PhD, Hector Gonzalez, MD,

Sleep Reading Center (Case Western Reserve/Brigham and Women's Hospital at Harvard Medical School) Susan Redline, PhD

Audiometry Reading Center (University of Wisconsin School of Medicine) Karen Cruikshanks, PhD

Nutrition Reading Center (University of Minnesota School of Public Health) John Himes, PhD, MPH

Central Laboratory (University of Minnesota Medical Center) John Eckfeldt, MD, PhD, Bharat Thygarajan, MD, PhD

NHLBI Project Office M. Larissa Avilés-Santa, MD, MPH, Paul D. Sorlie, PhD, Lorraine M. Silsbee, MHS,
